# Supplementary material for: P2X7 receptor signaling contributes to tissue factor–dependent thrombosis in mice
Source: JCI journal article supplement (doi:10.1172/jci46129), 2011-06-13
Supplement: sd1 [file 1]

301 Moved Permanently

# Moved Permanently

The document has moved here.
